# Supplementary material
Source: PubMed Central journal article supplement (PMC5805149)
Supplement: NIHMS935749-supplement-1.pdf [file NIHMS935749-supplement-1.pdf]

A

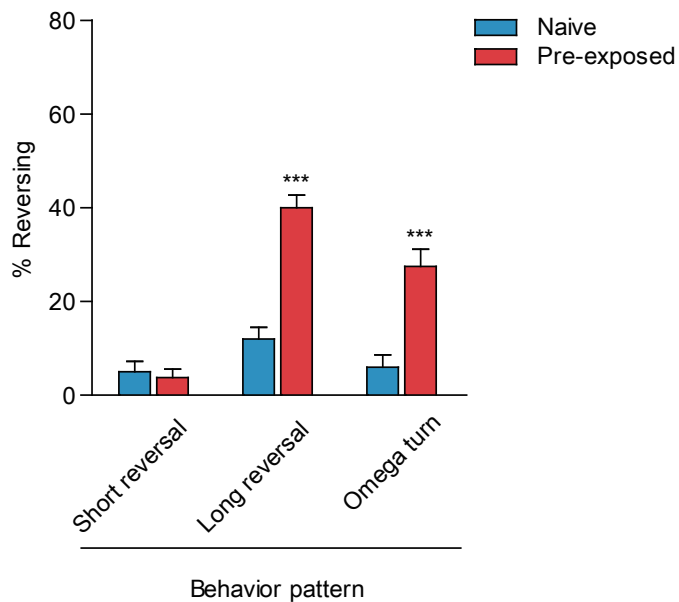

B

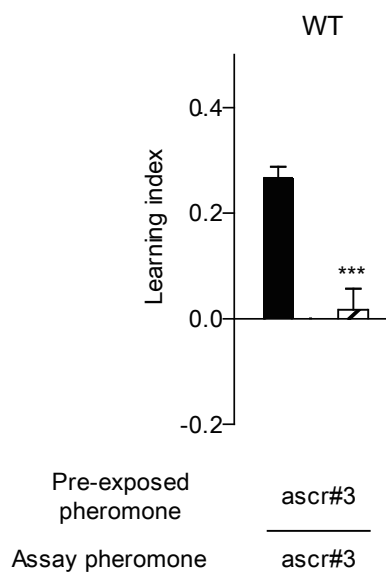

C

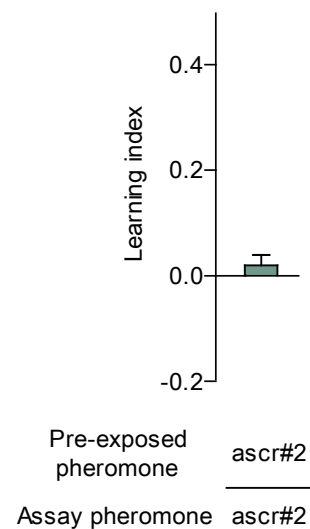

D

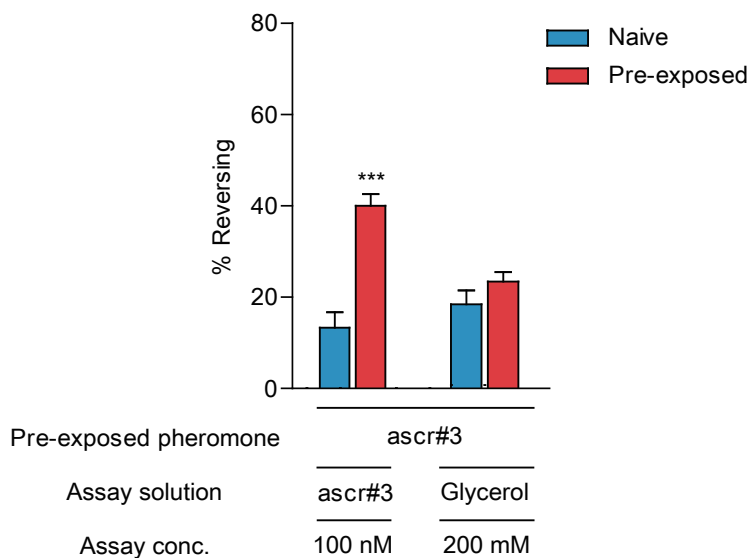

E

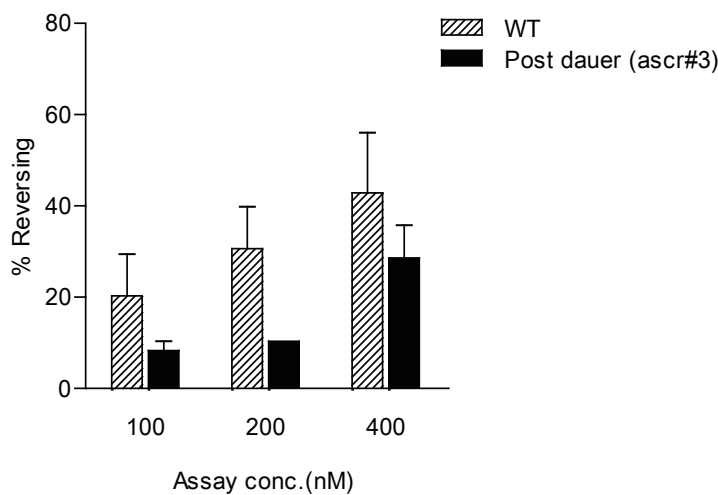

F

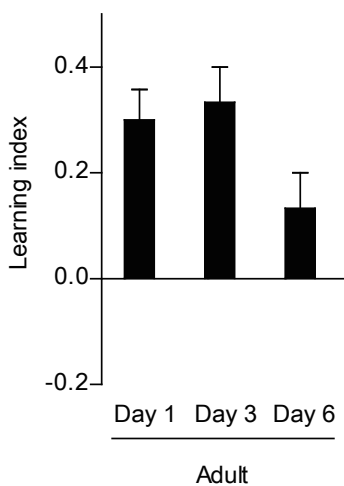

G

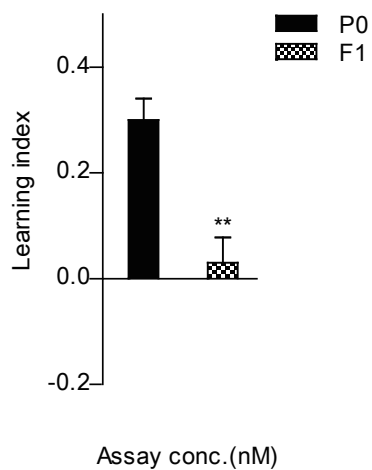

**Figure S1. Characterization of ascr#3 imprinting. Related to Figure 1.**

**(A)** Percentage of reversal of naive and pre-exposed adult animals performing short reversal, long reversal, or omega turn (See STAR methods). \*\*\* indicates different from naive at  $p < 0.001$  by one-way ANOVA with Bonferroni's post hoc test.  $n = 80-100$  each. Error bars represent SEM. **(B)** Learning index of males. \*\*\* indicates different from hermaphrodites at  $p < 0.001$  by Student's t-test.  $n = 60$ . Error bars represent SEM. **(C)** Learning index of adult animals that are pre-exposed to, and assayed with ascr#2.  $n = 50$  each. Error bars represent SEM. **(D)** Percentage of reversal of adult animals that are pre-exposed to ascr#3 and assayed with 200 mM glycerol. \*\*\* indicates different from naive at 0.001 by one-way ANOVA with Bonferroni's post hoc test.  $n = 60$ . Error bars represent SEM. **(E)** Percentage of reversal of wild-type post-dauer animals. The adults are recovered from the dauer stage induced by 600 nM ascr#3 exposure at 25°C.  $n = 30-40$  each. Error bars represent SEM. **(F)** Learning index of 1, 3, or 6 day-old adults.  $n = 30$  each. Error bars represent SEM. **(G)** Learning index of F1 progeny of ascr#3 imprinted animals imprinting. \*\* indicates different from P0 at  $p < 0.01$  by Student's t-test.  $n = 40$  each. Error bars represent SEM.

A

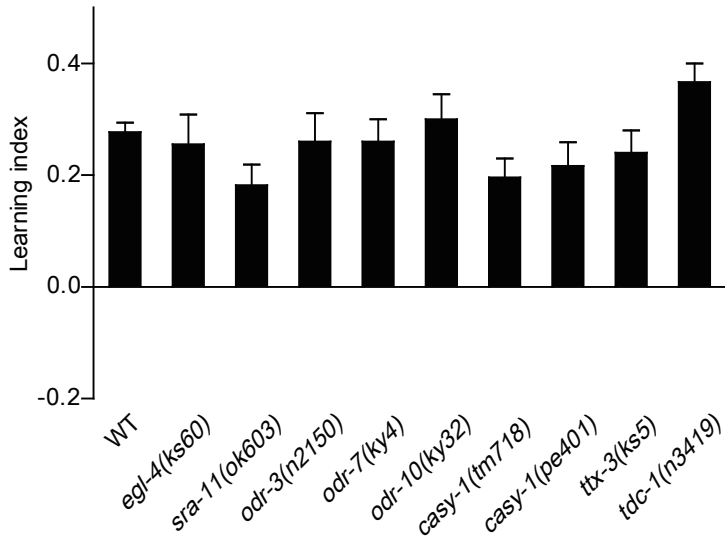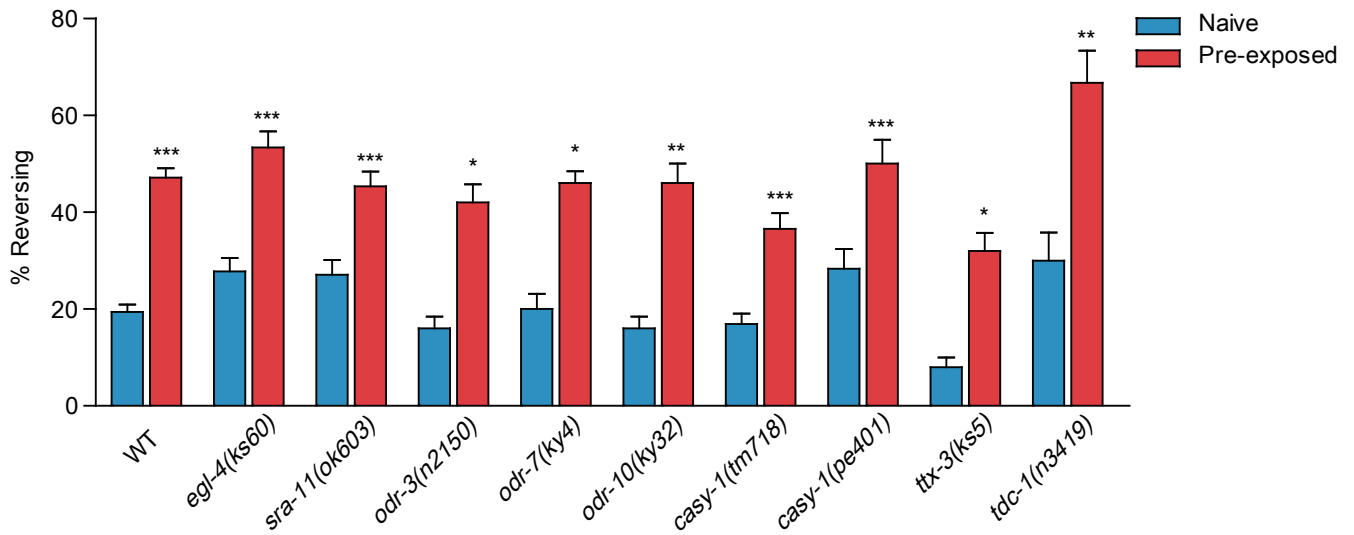

B

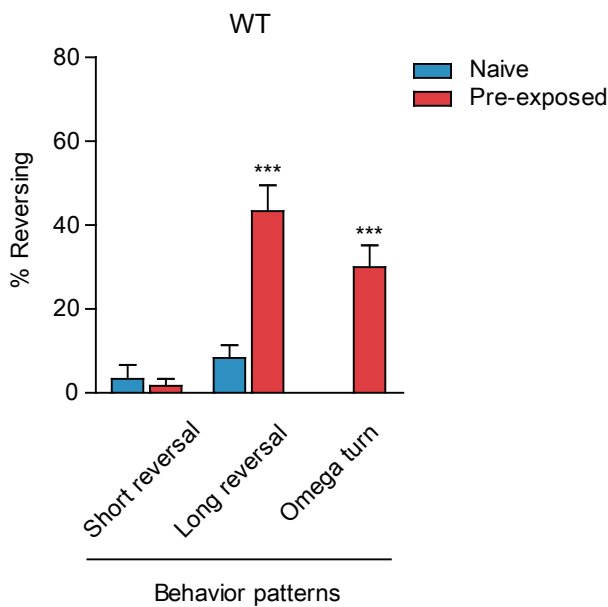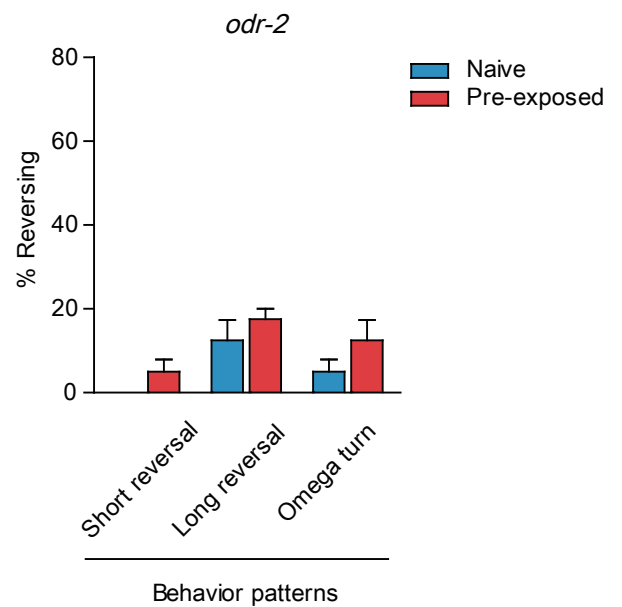

**Figure S2. Screen of candidate genes with a potential role in *ascr#3* imprinting. Related to Figure 2.**

**(A)** Learning index (top) and percent of reversal (bottom) of *egl-4*, *sra-11*, *odr-3*, *odr-7*, *odr-10*, *casy-1*, *ttx-3*, and *tdc-1* mutant animals. \*, \*\* and \*\*\* indicate different from WT at  $p < 0.05$ , 0.01 and 0.001, respectively, by one-way ANOVA with Bonferroni's post hoc test.  $n = 30-260$  each. Error bars represent SEM. **(B)** Percentage of reversal of wild-type and *odr-2* mutants performing short reversal, long reversal, or omega turn. \*\*\* indicates different from short reversal at  $p < 0.001$  by one-way ANOVA with Bonferroni's post hoc test.  $n = 40-60$  each. Error bars represent SEM.

A

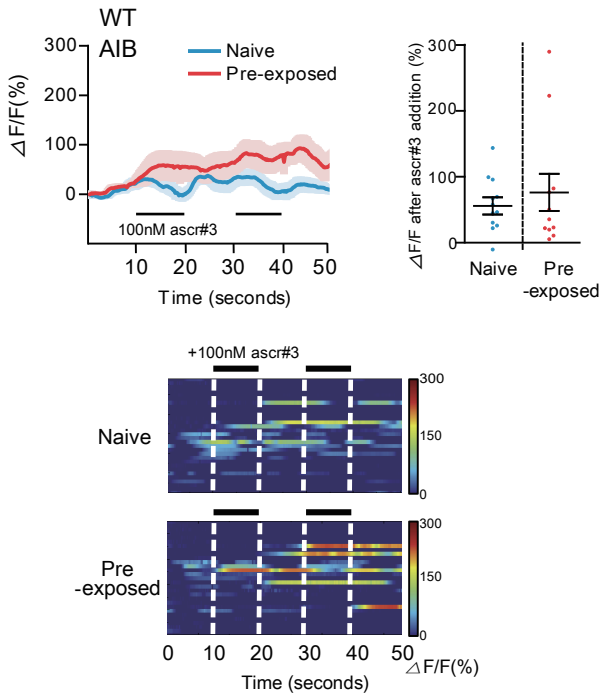

B

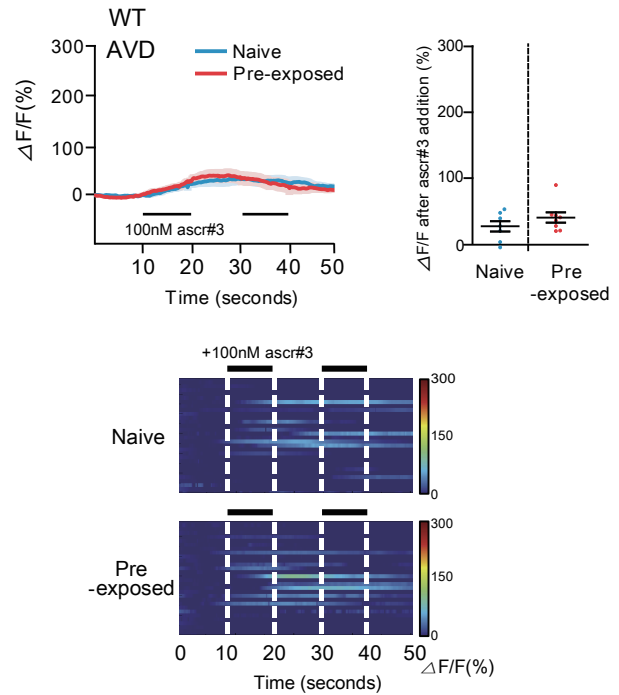

**Figure S3.  $\text{Ca}^{2+}$  transients of the AIB and AVD interneurons in response to ascr#3 exposure. Related to Figure 3.**

(A-B)  $\text{Ca}^{2+}$  transients of AIB (A) and AVD (B) in response to 100 nM ascr#3 exposure. The average traces of  $\text{Ca}^{2+}$  responses to 100 nM ascr#3 (left), heat map of individual  $\text{Ca}^{2+}$  responses to ascr#3 (bottom), and the maximum value of  $\text{Ca}^{2+}$  responses to 100 nM ascr#3 (right) in naive (shown in blue) and pre-exposed animals (shown in red) are shown.  $n=7-12$  (naive) and 8 (pre-exposed) each. Error bars represent SEM.

**A**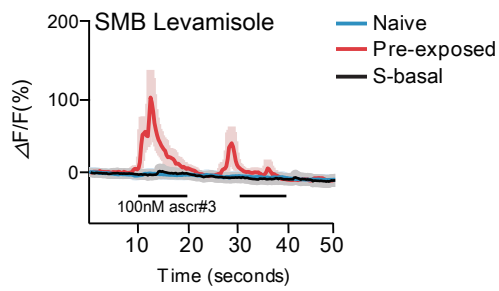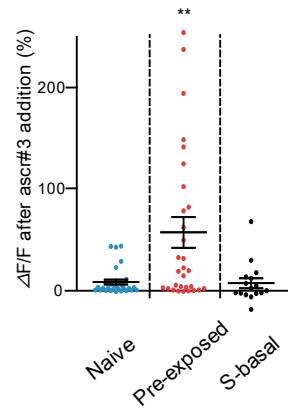**B**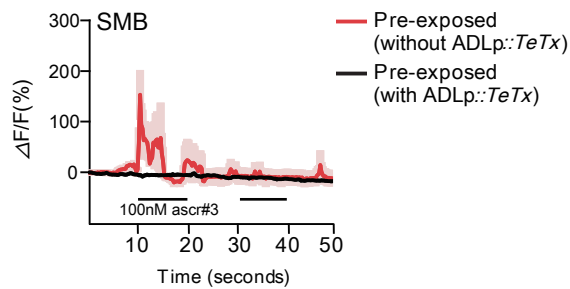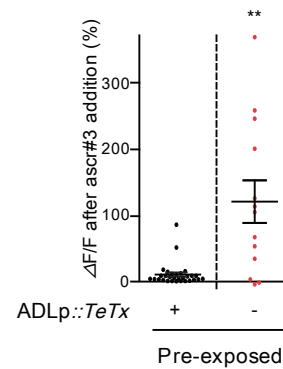

**Figure S4. Characterization of the SMB  $\text{Ca}^{2+}$  responses to ascr#3 exposure. Related to Figure 4.**

**(A)**  $\text{Ca}^{2+}$  transients of the SMB neurons in response to 100 nM ascr#3 in wild-type animals treated with levamisole. The average traces of  $\text{Ca}^{2+}$  responses to 100 nM ascr#3 (left) and the maximum of  $\text{Ca}^{2+}$  responses to 100 nM ascr#3 (right) in naive (shown in blue) and pre-exposed animals exposed to ascr#3 (shown in red) and naive animals exposed to S-basal (shown in black) are shown. \*\* indicates different from naive at  $p < 0.01$  by Student's t-test.  $n = 30$  (naive and pre-exposed) and 16 (S-basal) each. Error bars represent SEM. **(B)**  $\text{Ca}^{2+}$  transients in SMB of animals expressing ADLp::*TeTx*. Wild-type animals without or with an ADLp::*TeTx* transgene are shown in red or black, respectively. \*\* indicates different from pre-exposed ADLp::*TeTx* transgenic animals at  $p < 0.01$  by Student's t-test.  $n = 13$  (pre-exposed without ADLp::*TeTx*) and 30 (pre-exposed with ADLp::*TeTx*). Error bars represent SEM.
